# Supplementary material for: COVID-19 and liver cancer: lost patients and larger tumours
Source: PubMed Central journal article supplement (PMC9023844; doi:10.1136/bmjgast-2021-000794), 2022-04-21

## Supplementary Figure 2

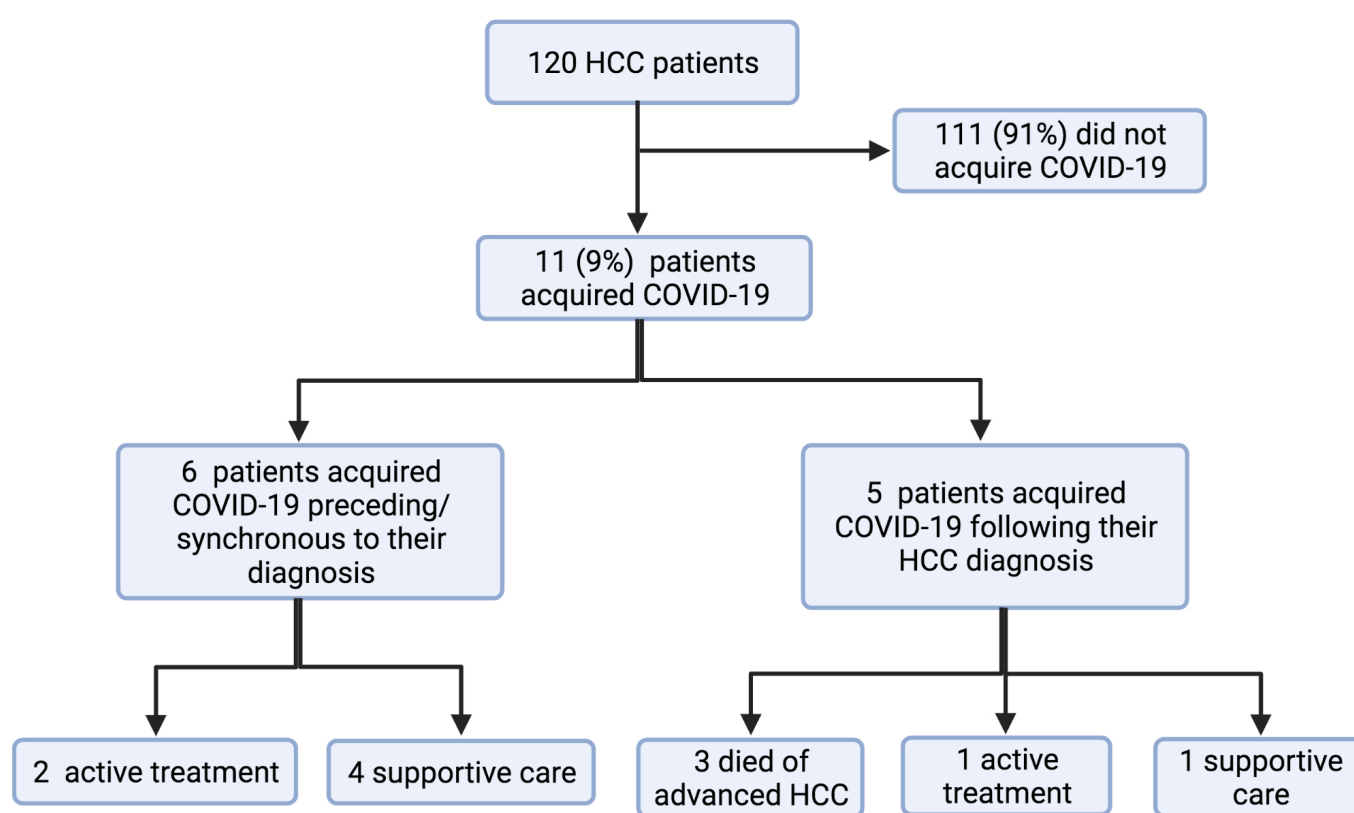

Supplement: bmjgast-2021-000794supp002.pdf [file bmjgast-2021-000794supp002.pdf]
